# Supplementary material
Source: publisher figshare collection journal article supplement (https://tandf.figshare.com/articles/dataset/_/7428947)
Supplement: Supplementary file 2 [file 1]

Archive with 2 entries (2 files):
- tadr_a_1553687_sm1326.mp4
- tadr_a_1553687_sm0414.pdf
